# Supplementary material for: Tungsten toxicity on kidney tubular epithelial cells induces renal inflammation and M1-macrophage polarization
Source: Research Square preprint supplement (doi:10.21203/rs.3.rs-2631634/v1), 2023-03-07
Supplement: Supplementary file 1 [file 9906e9066222ade0296332a6.docx]

**Supplementary table 1**. Primer Sequences

| **Gene** | **Forward (5' - 3')** | **Reverse (5' - 3')** |
| --- | --- | --- |
| *Mouse Csf1* | GCCTCCTGTTCTACAAGTGGAAG | ACTGGCAGTTCCACCTGTCTGT |
| *Mouse IL34* | GGACACACTTCTGGGGACA | CCAAAGCCACGTCAAGTAGG |
| *Mouse Ccl7* | CAGAAGGATCACCAGTAGTCGG | ATAGCCTCCTCGACCCACTTCT |
| *Mouse Cxcl2* | CGCCCAGACAGAAGTCATAG | TCCTCCTTTCCAGGTCAGTTA |
| *Mouse Gapdh* | TGAGGCCGGTGCTGAGTATGTCG | CCACAGTCTTCTGGGTGGCAGTG |
| *Mouse 18S* | CGC CGC TAG AGG TGA AAT TC | TCT TGG CAA ATG CTT TCG C |
| *Human CSF1* | TGAGACACCTCTCCAGTTGCTG | GCAATCAGGCTTGGTCACCACA |
| *Human IL34* | CCAAGGTGGAATCCGTGTTGTC | CACCTCACAGTCCTGCCAGTTT |
| *Human CCL7* | ACAGAAGGACCACCAGTAGCCA | GGTGCTTCATAAAGTCCTGGACC |
| *Human CXCL2* | GGCAGAAAGCTTGTCTCAACCC | CTCCTTCAGGAACAGCCACCAA |
| *Human CXCL10* | GGTGAGAAGAGATGTCTGAATCC | GTCCATCCTTGGAAGCACTGCA |
| *Human 18S* | GCAGAATCCACGCCAGTACAAG | GCTTGTTGTCCAGACCATTGGC |
